# Supplementary material for: Reactive spark plasma sintering of YAG–YAG:Ce composite phosphor ceramics for laser-driven lighting with high luminous efficacy
Source: Royal Society of Chemistry journal article supplement (doi:10.1039/d4tc04942j), 2025-01-01
Supplement: d4tc04942j1.pdf [file d4tc04942j1.pdf]

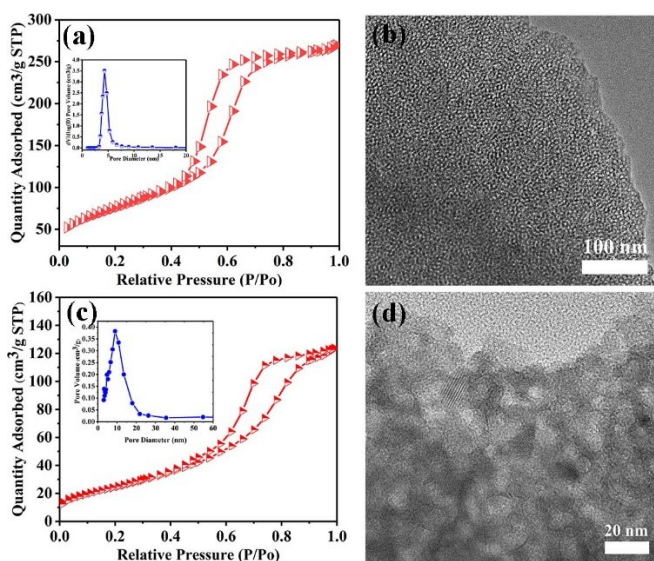

**Fig. S1** (a, c) N<sub>2</sub> isotherm adsorption-desorption curves and pore size distributions (insets) and (b, d) TEM images of the synthesized Al<sub>2</sub>O<sub>3</sub> powders and Y<sub>2</sub>O<sub>3</sub> powders, respectively.

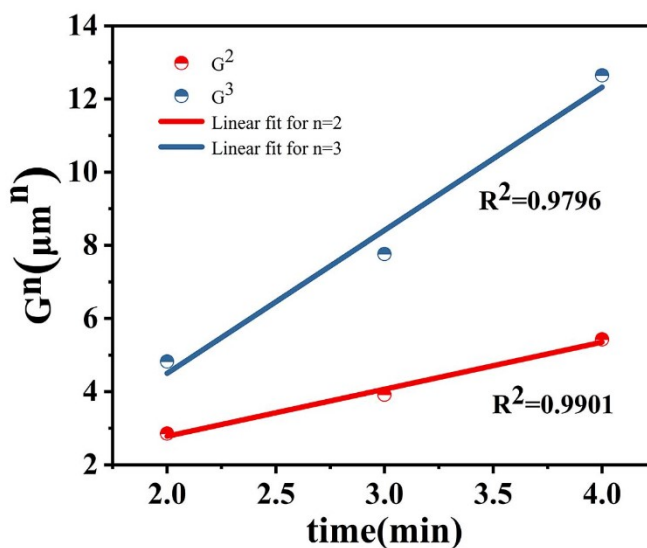

**Fig. S2** Fitting curves of  $G^n$  and holding time  $t$  of YAG ceramics at 1350°C

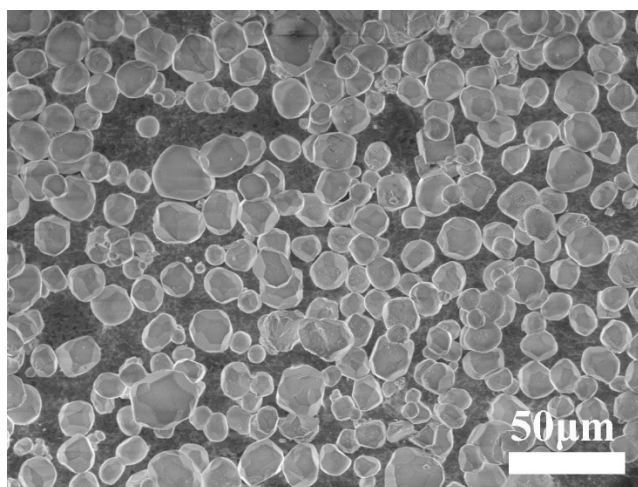

**Fig. S3** SEM image of the commercial YAG:Ce phosphor.

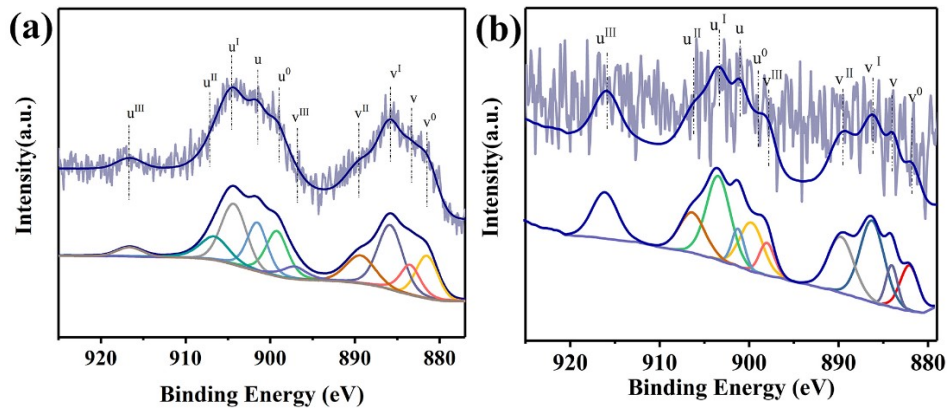

**Fig. S4** X-ray photoelectron spectroscopy (XPS) spectra of Ce 3d<sub>3/2,5/2</sub> in (a) YAG:Ce phosphors and (b) YAG-YAG:Ce CPC, and corresponding fitting curves.

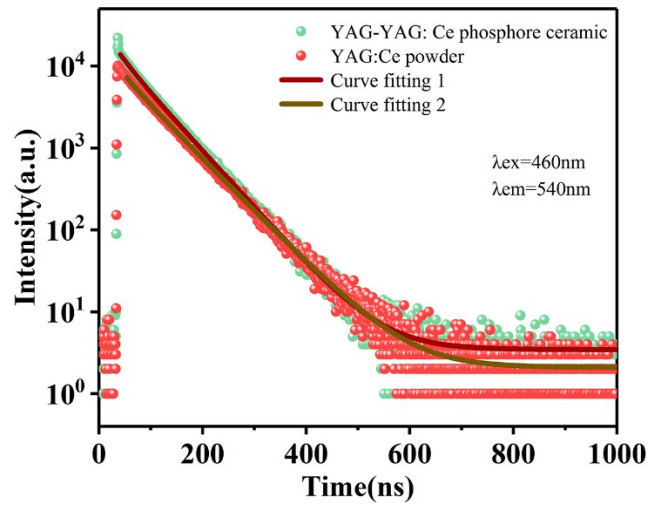

**Fig. S5** The fluorescence decay curves of YAG:Ce phosphors, YAG-YAG:Ce CPC and corresponding fitting curves. Fitting curve 1 is for YAG-YAG:Ce CPC, and fitting curve 2 is for YAG:Ce phosphors. The excitation and emission wavelengths are 460 nm and 540 nm, respectively.

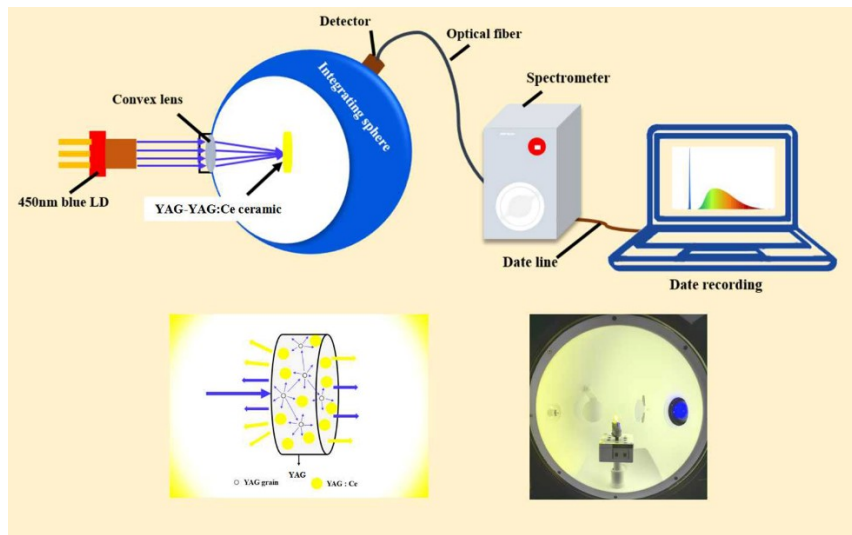

**Fig. S6** The measurement device scheme and physical map after being lighted up in remote excitation for laser-driven illumination.

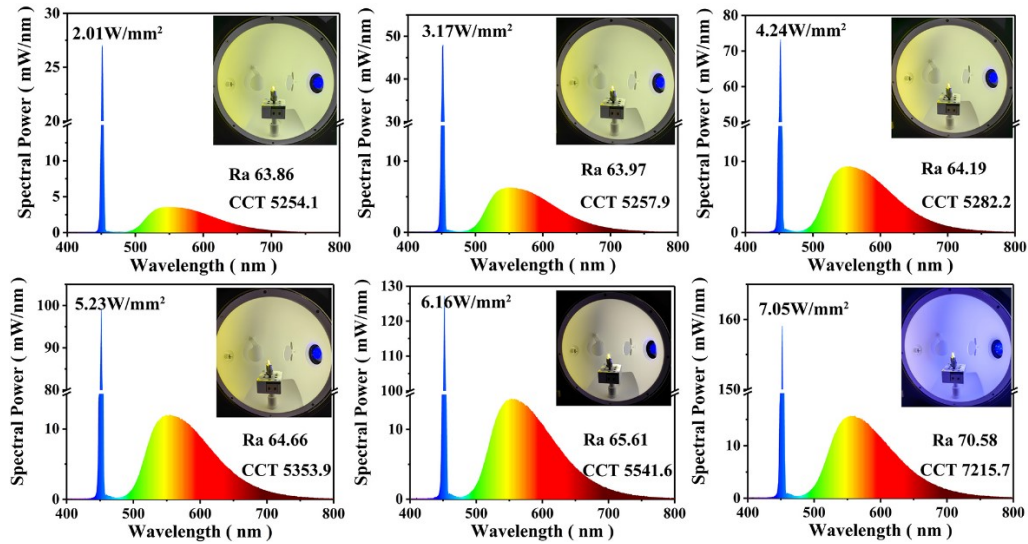

**Fig. S7** Luminescence spectra and corresponding color rendering indexes (CRI), correlated color temperatures (CCT) and physical images of YAG:YAG:Ce CPC with a 6 wt% phosphor concentration under 450 nm blue lasers with different power densities.

**Table S1** The core excitation binding energy (eV) of Ce 3d in YAG:Ce phosphors and YAG-20 wt% YAG:Ce CPC, and the corresponding relative contents collected from Ce<sup>3+</sup> and Ce<sup>4+</sup>.

|                        | Ce:<br>YAG        | Peak/eV | Area/a.u. | Relative<br>perc/% | CPC               | Peak/eV | Area/a.u. | Relative<br>perc/% |
|------------------------|-------------------|---------|-----------|--------------------|-------------------|---------|-----------|--------------------|
| Ce <sup>4+</sup><br>3d | 3d <sub>3/2</sub> | 901.55  | 1930.21   | 43.51%             | 3d <sub>3/2</sub> | 901.63  | 182.96    | 45.40%             |
|                        | 3d <sub>5/2</sub> | 883.49  | 1252.54   |                    | 3d <sub>5/2</sub> | 883.43  | 167.61    |                    |
|                        | 3d <sub>3/2</sub> | 906.61  | 1386.52   |                    | 3d <sub>3/2</sub> | 905.89  | 295.41    |                    |
|                        | 3d <sub>5/2</sub> | 889.36  | 1535.88   |                    | 3d <sub>5/2</sub> | 889.19  | 625.3     |                    |
|                        | 3d <sub>3/2</sub> | 916.57  | 409.54    |                    | 3d <sub>3/2</sub> | 916.13  | 467.58    |                    |
|                        | 3d <sub>5/2</sub> | 897.16  | 696.69    |                    | 3d <sub>5/2</sub> | 897.38  | 198.45    |                    |
| Ce <sup>3+</sup><br>3d | 3d <sub>3/2</sub> | 899.22  | 1965.08   | 56.49%             | 3d <sub>3/2</sub> | 900.06  | 605.46    | 54.60%             |
|                        | 3d <sub>5/2</sub> | 881.51  | 1657.74   |                    | 3d <sub>5/2</sub> | 881.78  | 331.68    |                    |
|                        | 3d <sub>3/2</sub> | 904.32  | 2708.86   |                    | 3d <sub>3/2</sub> | 903.53  | 702.48    |                    |
|                        | 3d <sub>5/2</sub> | 885.85  | 3031.41   |                    | 3d <sub>5/2</sub> | 885.8   | 689.97    |                    |

**Table S2.** Typical research progress of Ce:YAG phosphor ceramics.

| Composition                                 | Saturation Power Density (W/mm <sup>2</sup> ) | LF (lm) | LE (lm/W) | Reference |
|---------------------------------------------|-----------------------------------------------|---------|-----------|-----------|
| YAG:Ce phosphor in silica glass (PiSG)      | 3.46                                          | —       | —         | 1         |
| Single-phase YAG:Ce transparent ceramic     | —                                             | —       | 170       | 2         |
| Al <sub>2</sub> O <sub>3</sub> -YAG:Ce CPCs | —                                             | 1169    | 166       | 3         |
|                                             | 47.6                                          | 651     | 144       | 4         |

|                                                         |             |            |              |                  |
|---------------------------------------------------------|-------------|------------|--------------|------------------|
| Al <sub>2</sub> O <sub>3</sub> -YAG:Ce<br>CPCs@aluminum | 20          | 4294       | 215          | 5                |
| BaAl <sub>2</sub> O <sub>4</sub> -YAG:Ce CPCs           | —           | 479        | 37           | 6                |
| MgO-YAG:Ce CPCs                                         | 32.2        | 3979       | 292          | 7                |
| MgF <sub>2</sub> -MgO-YAG:Ce<br>CPCs                    | 34.6        | 2834       | 198.9        | 8                |
| AlN-YAG:Ce CPCs                                         | —           | 639        | 266          | 9                |
| YAG-YAG:Ce CPCs                                         | 9.60        | —          | 142          | 10               |
| Y <sub>2</sub> O <sub>3</sub> -YAG:Ce CPCs              | 6.14        | 805        | 178.4        | 11               |
| <b>YAG-YAG:Ce CPCs</b>                                  | <b>6.68</b> | <b>844</b> | <b>202.1</b> | <b>This work</b> |

- 1 D. Zhang, W. Xiao, C. Liu, X. Liu, J. Ren, B. Xu, J. Qiu, Highly efficient phosphor-glass composites by pressureless sintering, *Nat Commun*, **2020**, *11* (1), 2805.
- 2 J. Kang, L. Zhang, Y. Li, Y. Ma, B. Sun, Y. Liu, T. Zhou, A. S. Farida, C. Wang, H. Luminescence declining behaviors in YAG:Ce transparent ceramics for high power laser lighting, *Journal of Materials Chemistry C*, **2019**, *7*(45), 14357.
- 3 Y. Wang, X. Huang, Z. Cheng, D. Hu, D. Zhu, P. Chen, F. Tian, Q. Yuan, D.Y. Kosyanov, J. Li, Al<sub>2</sub>O<sub>3</sub>-Ce:YAG composite phosphor ceramics for white laser lighting: Novel preparation and regulatable properties, *J. Am. Ceram. Soc.*, **2023**, *106* (10), 5933-5943.
- 4 J. Wang, L. Zhang, J. Kang, M. Li, C. Shi, P. Yang, B. Sun, Y. Li, W. Strek, H. Chen, Laminated structural Al<sub>2</sub>O<sub>3</sub>/YAG:Ce composite ceramic phosphor with high front light emission for transmissive laser lighting, *Opt. Express*, **2023**, *31*, 41556-41568.
- 5 G. Xi, Z. Zhou, J. Li, L. Zeng, S. Lin, P. Wang, H. Lin, Y. Wang, S. Zhou, F. Huang, G. Chen, D. Chen Transparent composite Ceramic@aluminum with ultra-high thermal conductivity for high-brightness laser-driven lighting, *Adv. Funct. Mater.*, **2024**, *34*(36), 2401026.
- 6 Y. Tian, J. Chen, X. Yi, D. Zhao, Z. Weng, Y. Tang, H. Lin, S. Zhou, A new BaAl<sub>2</sub>O<sub>4</sub>-YAG: Ce composite ceramic phosphor for white LEDs and LDs lighting, *J. Eur. Ceram. Soc.*, **2021**, *41*, 4343–4348.
- 7 H. Zhao, H. Yu, J. Xu, M. Zhang, X. Li, X. Sun, Novel high-thermal-conductivity composite ceramic phosphors for high-brightness laser-driven lighting, *Journal of Materials Chemistry C*, **2021**, *9* (32), 10487-10496.
- 8 L. Chen, Z. Ma, J. Chen, et al. MgF<sub>2</sub>-doped MgO-YAG:Ce composite ceramics prepared by pressureless vacuum sintering for laser-driven lighting, *J. Lumines*, **2024**, *266*, 120301.
- 9 K. Fujioka, K. Yagasaki, T. Sawada, et al. AlN-Ce-doped yttrium aluminum garnet composite ceramic phosphor for high-power laser lighting. *Optical Materials*, **2021**, 121:111507.
- 10 Q. Zhu, S. Li, Q. Yuan, et al. Transparent YAG:Ce ceramic with designed low light scattering for high-power blue LED and LD applications. *Journal of the European Ceramic Society*, **2021**, *41*(1):735-740.
- 11 H. Fang, B. Zhou, J. Wang, X. Hu, Z. Pan, S. Fan, P. Huang, S. Gu, L. Wang, W. Jiang, Y<sub>2</sub>O<sub>3</sub>-YAG:Ce composite phosphor ceramics with enhanced light extraction efficiency for solid-state laser lighting, *J. Mater. Chem. C*, **2022**, *10*(42), 16147-16156.
